1 Site-directed crosslinking identifies the stator-rotor interaction surfaces in a hybrid  
2 bacterial flagellar motor

3

4 Hiroyuki Terashima<sup>a,#</sup>, Seiji Kojima<sup>a</sup>, and Michio Homma<sup>a,#</sup>

5

6 <sup>a</sup>Division of Biological Science, Graduate School of Science, Nagoya University,

7 Chikusa-ku, Nagoya 464-8602, Japan.

8

9 Running title: Stator-rotor interaction in bacterial flagellar motor

10

11 # Address correspondence to Hiroyuki Terashima, [terashima.hiroyuki@h.mbox.nagoya-](mailto:terashima.hiroyuki@h.mbox.nagoya-)

12 [u.ac.jp](mailto:u.ac.jp), and Michio Homma, [g44416a@cc.nagoya-u.ac.jp](mailto:g44416a@cc.nagoya-u.ac.jp)

13

14 Word counts of Abstract: 234 words

15 Word counts of Text (Title to Acknowledgement): 4589 words

16

## 17 **Abstract**

18       The bacterial flagellum is the motility organelle powered by a rotary motor. The rotor  
19 and stator elements of the motor are embedded in the cytoplasmic membrane. The  
20 stator units assemble around the rotor, and an ion flux (typically H<sup>+</sup> or Na<sup>+</sup>) conducted  
21 through a channel of the stator induces conformational changes that generate rotor  
22 torque. Electrostatic interactions between the stator protein PomA in *Vibrio* (MotA in  
23 *Escherichia coli*) and the rotor protein FliG have been suggested by genetic analyses,  
24 but have not been demonstrated directly. Here, we used site-directed photo- and  
25 disulfide-crosslinking to provide direct evidence for the interaction. We introduced a UV-  
26 reactive amino acid, *p*-benzoyl-L-phenylalanine (*p*BPA), into the cytoplasmic region of  
27 PomA or the C-terminal region of FliG in intact cells. After UV irradiation, *p*BPA inserted  
28 at a number of positions formed a crosslink with FliG. PomA residue K89 gave the  
29 highest yield of crosslinks, suggesting that it is the PomA residue nearest to FliG. UV-  
30 induced crosslinking stopped motor rotation, and the isolated hook-basal body  
31 contained the crosslinked products. *p*BPA inserted to replace residues R281 or D288 in  
32 FliG formed crosslinks with the *Escherichia coli* stator protein, MotA. A cysteine residue  
33 introduced in place of PomA K89 formed disulfide crosslinks with cysteine inserted in  
34 place of FliG residues R281 and D288, and some other flanking positions. These results  
35 provide the first demonstration of direct physical interaction between specific residues in  
36 FliG and PomA/MotA.

37

## 38 **Importance**

39       The bacterial flagellum is a unique organelle that functions as a rotary motor. The

40 interaction between the stator and rotor is indispensable for stator assembly into the  
41 motor and the generation of motor torque. However, the interface of the stator-rotor  
42 interaction has only been defined indirectly by mutational analysis. Here, we detected  
43 the stator-rotor interaction using site-directed photo- and disulfide-crosslinking  
44 approaches. We identified several residues in the PomA stator, especially K89, that are  
45 in close proximity to the rotor. Moreover, we identified several pairs of stator and rotor  
46 residues that interact. This study directly demonstrates the nature of the stator-rotor  
47 interaction and suggests how stator units assemble around the rotor and generate  
48 torque in the bacterial flagellar motor.  
49

## 50 Introduction

51 F-type ATP synthase, V/A-type ATPase, and the bacterial flagellum are well-known  
52 examples of ion-driven molecular rotary motors (1, 2). The flagellum of bacteria other  
53 than spirochetes has a helical filament that extends from the cell surface and functions  
54 as a rotary screw to propel swimming. The rotary motor of the bacterial flagellum  
55 consists of a rotor surrounded by varying numbers of stator units, with both the rotor  
56 and stator embedded in the cytoplasmic membrane (3-6). The rotor contains a  
57 transmembrane MS-ring and an attached cytoplasmic C-ring below the MS-ring (7, 8).  
58 In many bacteria, the C-ring contains the three proteins FliG, FliM and FliN. Mutations in  
59 the genes encoding these proteins can confer *fla*, *mot* and *che* phenotypes,  
60 corresponding to deficiencies in flagellar formation, motor rotation, or the switching  
61 between CCW and CW rotation (5, 9). FliG is thought to interact with the stator units to  
62 generate torque (10, 11).

63 MotA and MotB in *Escherichia coli* (*E. coli*), and PomA and PomB in *Vibrio* species  
64 are the membrane proteins that comprise the stator complex (12-16). The A subunit has  
65 four transmembrane segments (TM) and a large cytoplasmic region between TM2 and  
66 TM3. The B subunit has one TM in its N-terminal region and a peptidoglycan-binding  
67 (PGB) domain in its C-terminal region (17-19). In *E. coli*, at least 11 stator units can  
68 assemble around, and interact with, the rotor. They are anchored at the proper position  
69 by the PGB domain, and once incorporated, the stator unit is activated for ion  
70 conduction and motor rotation (20-25). The coupling ion is a proton in the *E. coli* motor  
71 and a sodium ion in the *Vibrio* motor; it is conducted to the cytoplasm through an ion-  
72 transporting pathway in the stator complex (26, 27). A conserved aspartate residue in

73 the TM of the B subunit receives the coupling ion from outside the cytoplasm, and the  
74 ion then dissociates into the cytoplasm (28-30). The ion-binding and release cycle  
75 induces conformational changes in the stator complex that change the interactions  
76 between the A subunit of the stator and FliG of the rotor (31, 32).

77 Earlier biochemical studies demonstrated the stator-rotor interaction using a His-tag  
78 pull-down assay (33). Stator interactions with the rotor protein have been examined in  
79 detail in *E. coli* using genetic analysis (34-36). MotA and FliG in *E. coli* have well-  
80 conserved charged residues, R90 and E98 in MotA and R281, D288 and D289 in the C-  
81 terminal domain of FliG (Fig. S1A, S1B). Charge neutralization or inversion of these  
82 residues leads to defects in motility, and the proper combinations of charge reversals  
83 between MotA and FliG synergistically rescue motility. The conserved charged residues  
84 in the A subunit are important for torque generation and assembly of the stator units into  
85 the motor (24, 25, 37). In contrast, charge neutralization or inversion of the  
86 corresponding residues in *Vibrio* did not abolish motility, suggesting that the charged  
87 residues are important, but not critical, for flagellar rotation in *Vibrio* (Fig. S1A, S1B) (38,  
88 39). This result implies that additional residues contribute to motor rotation. Since the  
89 stator-rotor interaction in the *Vibrio* flagellar motor is likely to be more extensive than in  
90 *E. coli* (25, 40), *Vibrio* PomA is better suited for the examination of interactions between  
91 the stator A subunit and FliG of the rotor.

92 Structural information is indispensable for understanding the mechanism that  
93 produces rotation of the bacterial flagellar motor. Until recently, we had only low-  
94 resolution density maps of the stator unit obtained through single-particle analysis using  
95 electron microscopy (41, 42). However, atomic resolution structures of MotA/MotB from

96 *Campylobacter jejuni*, *Clostridium sporogenes*, *Bacillus subtilis* and other species have  
97 been reported recently (43, 44). The structures resemble the structure of ExbB (45-47).  
98 MotA and PomA share a weak sequence homology with ExbB of the Ton bacterial  
99 transport system, which transports relatively large molecules, such as siderophores and  
100 vitamin B<sub>12</sub>, into the cell (43, 44). The MotA/MotB and PomA/PomB complexes exist as  
101 a 5:2 hetero-heptamer, although the stoichiometry was previously proposed as a 4:2  
102 hetero-hexamer (14, 16, 42). The atomic resolution structures of the stator provide  
103 insight into its organization and its contribution to flagellar rotation. Dynamic interactions  
104 between the stator and rotor generate torque that rotates the flagellum. However, the  
105 molecular details of the stator-rotor interaction remain obscure.

106 In this study, we probed residues of PomA for the ability to crosslink with FliG using  
107 a site-directed *in vivo* photo-crosslinking technique. This technique allows *pBPA*, a  
108 phenylalanine derivative containing a UV-reactive benzophenone group, to be charged  
109 to an amber suppressor tRNA *in vivo* by a mutated tyrosyl-tRNA synthase from  
110 *Methanococcus jannaschii*. *pBPA* can be incorporated into any protein of interest by  
111 introducing an amber codon into the target position (48). The *pBPA* incorporated into the  
112 protein forms a covalent bond with a close C-H bond upon UV irradiation. Another  
113 approach utilizes disulfide bond formation between cysteine residues inserted at desired  
114 positions in two interacting proteins. Here, we report that photo-crosslinked and  
115 disulfide-crosslinked products are formed between targeted residues of PomA and FliG.  
116 This work provides the first direct evidence to show which residues in the stator and  
117 rotor are in close juxtaposition and suggests interactions that are responsible for stator  
118 assembly and torque generation in the flagellar motor.

119

## 120 **Results**

121 **Effect of PomA with *pBPA* on *E. coli* cell motility.** Because we were unable to adapt  
122 the technique for introducing *pBPA* into *Vibrio*, we performed a photo-crosslinking  
123 experiment in *E. coli* using a chimeric PomA/PotB stator unit that functions in *E. coli*.  
124 PotB is a chimeric protein in which the N-terminal region of PomB is fused to the C-  
125 terminal region of *E. coli* MotB (49). We introduced *pBPA* at each position in PomA from  
126 E74 to F104. This region contains the important charged residues, R88 and E96, which  
127 are proposed to interact with FliG (Fig. S1A, S1C). First, we examined whether PomA  
128 with the *pBPA* insertions confers motility to an *E. coli*  $\Delta$ *motAB* null strain. The *pBPA*  
129 substitutions at L76, I77, I80, A84, G91, L95, N102 and F104 caused loss of motility  
130 (Fig. S2). None of these proteins other than the one with a substitution at L95 could be  
131 detected in the cells (Fig. S3). PomA could be detected in all the motile cells (Fig. S3).  
132 PomA with substitutions at A87, R88 and E96 support much less motility than wild-type  
133 PomA (Fig. S2). These results suggest that residues A87, R88, L95 and E96 are at, or  
134 are very close to, the sites that are important for motor function.

135

136 **Detection of photo-crosslinked products of PomA and FliG.** We UV-irradiated cells  
137 expressing PomA containing *pBPA* and then probed by immunoblotting with anti-FliG  
138 antibody for crosslinked products. Crosslinking was observed when *pBPA* replaced the  
139 residues D85, R88, K89, G90, F92, L93 and E96, whereas it was not observed in the  
140 vector control or with wild-type PomA (Fig. 1A lower panels; for the complete set of  
141 mutants, see Fig. S3). This result indicates that PomA with *pBPA* formed photo-

142 crosslinks with FliG. The only crosslinked product identified by probing with anti-PomA  
143 antibody was observed when *pBPA* replaced K89, presumably because of the low titer  
144 of the anti-PomA antibody (Fig. 1A, upper panels). Consistent with this result, the signal  
145 intensity of crosslinked products detected by the anti-FliG antibody was strongest when  
146 *pBPA* replaced K89 (Fig. 1A).

147 We determined the fraction of motile cells before and after UV irradiation because  
148 we expected that the PomA-FliG crosslink would block motor function. With wild-type  
149 PomA, almost the same fraction of cells swam before and after UV irradiation.  
150 Irradiation of the cells containing *pBPA* replacing R88, K89, L93 and E96 did not swim  
151 after UV irradiation, and cells with *pBPA* replacing G90 and F92 mutants had a lower  
152 motile fraction (Fig. 1B). These results suggest that the residues R88, K89, G90, F92,  
153 L93 and E96 of PomA are close enough to the rotor C-ring to form crosslinks with FliG.

154

155 ***pBPA*-labeled PomA binds to the C-ring after photo-crosslinking.** Most of the  
156 photo-crosslinked products described above could have arisen through crosslinking  
157 between PomA freely diffusing in the cytoplasmic membrane and FliG freely diffusing in  
158 the cytoplasm (please see Fig. S4, as described below). Therefore, we examined  
159 whether photo-crosslinked PomA was associated with the isolated hook-basal body  
160 (HBB) fraction. After UV irradiation of cells expressing PomA with *pBPA* replacing D85,  
161 R88, K89, G90, F92, L93 or E96, the cells were solubilized using TritonX-100, and then  
162 HBBs were isolated using ultra-centrifugation. In immunoblots developed using the anti-  
163 FliG antibody, the HBB fractions contained photo-crosslinked products when *pBPA*  
164 replaced D85, R88, K89, and L93 (Fig. 2). The crosslinked products were most evident



165 when *pBPA* replaced PomA K89. Unfortunately, we could not see PomA/PotB bound to  
166 the C-ring in electron micrographs. These results confirm that the PomA/PotB complex  
167 associates with FliG assembled into the rotor and support the suggestion that that K89  
168 is in the closest proximity to FliG.

169

170 ***pBPA*-labeled PomA binds to FliG diffusing freely in the cytoplasm.** We next  
171 examined whether PomA/PotB interacts with freely diffusing FliG. We expressed PomA  
172 with *pBPA* replacing D85, R88, K89, G90, F92, L93 or E96 and PotB from plasmid  
173 pTSK170 in *E. coli*  $\Delta flhDC$  cells, which lack all flagellar proteins. We co-expressed *E.*  
174 *coli* FliG in these cells. After UV irradiation of these cells, we probed the photo-  
175 crosslinked products by immunoblotting with anti-PomA and anti-FliG antibodies. PomA  
176 with *pBPA* replacing K89 produced a large amount of crosslinked product, whereas the  
177 other proteins showed fewer crosslinked products (Fig. S4). We speculate that photo-  
178 crosslinked products could be detected in this experiment using the anti-PomA antibody  
179 because we produced FliG in great excess.

180

181 **FliG residues that interact with PomA.** Residues R281 and D288 of *E. coli* FliG have  
182 been implicated in interacting with MotA. First, we investigated whether FliG with *pBPA*  
183 introduced at these two positions formed crosslinked products with endogenous *E. coli*  
184 MotA (Fig. 3, S1B). Indeed, when these proteins were expressed as the sole FliG, we  
185 detected crosslinked FliG-MotA using anti-MotA antibody, whereas the vector control  
186 and wild-type FliG did not form the crosslinked product. Further, FliG with *pBPA*  
187 replacing K264, D289 and R297 also did not form the crosslinked products. This result

188 suggests that R281 and D288 are in close proximity to MotA.

189       Next, we investigated whether PomA containing cysteine replacements for residues  
190 K89 and L93 could form disulfide crosslinks with FliG containing cysteine replacements  
191 at critical residues. Previous genetic studies (25) suggested that PomA K89 interacts  
192 with residues R301, D308 and D309 of *Vibrio* FliG. Therefore, we co-expressed PomA  
193 K89C/PotB together with the Q280C, R281C, A282C, D288C or D289C variants of *E.*  
194 *coli* FliG in a  $\Delta motA/\Delta fliG$  *E. coli* mutant. These FliG residues correspond to K300,  
195 R301, A302, D308, and D309 of *Vibrio*. We also expressed PomA L93C/PotB with  
196 I285C and L286C variants of *E. coli* FliG. I285 and L286 are hydrophobic residues  
197 located between R281 and D288 (Fig. S1B). Cells expressing only R281C FliG or L93C  
198 PomA lost motility in soft agar (Fig. S5), suggesting that these residues are critical for  
199 motor function. Cells expressing K89C PomA with wild-type FliG and Q280C, A282C,  
200 D288C or D289C FliG with wild-type PomA retained motility (Fig. S5). Cells co-  
201 expressing PomA K89C and FliG Q280C, A282C or D288C had reduced motility (Fig.  
202 S5).

203       We next tried to detect disulfide-crosslinked products between PomA and FliG. After  
204 oxidation with copper phenanthroline, we detected disulfide-crosslinked products of  
205 PomA K89C with FliG Q280C, R281C, A282C and D288C with anti-PomA or anti-FliG  
206 antibody (Fig. 4). The crosslinked products disappeared upon treatment with the  
207 reducing agent  $\beta$ -mercaptoethanol (Fig. S6). In contrast, PomA L93C did not form  
208 disulfide crosslinks with either FliG I285C or L286C (Fig. 4).

209

210 **Effect of the conserved aspartate residue in the B subunit on crosslinking**

211 **efficiency.** Flagellar rotation is powered by conformational changes of the stator units  
212 that are driven by ion conduction. Therefore, we thought that the interaction pattern  
213 between PomA and FliG might be different in the presence and absence of Na<sup>+</sup>. We  
214 expressed PomA with various pBPA substitutions and PotB in *E. coli*  $\Delta$ *motAB* cells and  
215 irradiated these cells with UV in the presence of Na<sup>+</sup> or K<sup>+</sup>, followed by immunoblotting.  
216 There were no reproducible differences in crosslinking (Fig. S7). Next, we examined  
217 photo-crosslinking when the pBPA-substituted PomA proteins were co-expressed with  
218 PotB D24N, which has no ability to bind Na<sup>+</sup> or support ion flow (30). The equivalent  
219 D32N substitution in *E. coli* (D33N in *Salmonella*) confers a dominant-negative effect on  
220 motility (28, 31, 50, 51). It has been speculated that aspartate to asparagine substitution  
221 mimics the protonated or Na<sup>+</sup>-bound state of the aspartyl residue. The crosslinking  
222 patterns with D24N PotB were similar to those seen with wild-type PotB (Fig. 5, S8), but  
223 the signal intensities of the crosslinked products with PotB D24N were stronger than  
224 those seen with wild-type PotB (Fig. 5).

225

## 226 **Discussion**

227 Previous genetic studies in *E. coli* and *Salmonella* showed that electrostatic  
228 interactions between the conserved charged residues of the stator A subunit and FliG in  
229 the rotor are important both for assembly of stator units into the motor and for torque  
230 generation (24, 34-37). Similar studies in *Vibrio alginolyticus* suggested that interactions  
231 in addition to the electrostatic interactions contribute to motor rotation (25, 38-40, 52). In  
232 this study, we used two different chemical crosslinking approaches to identify the  
233 residues in the *Vibrio* PomA subunit that are in close proximity to FliG, and the residues

234 in *E. coli* FliG that are in close proximity to PomA. Crosslinked products were found in  
235 the isolated hook-basal body, indicating that crosslinking occurred in the intact motor.  
236 We also observed motility defects caused by photo-crosslinking, indicating that the  
237 crosslinking occurred, at least in part, within the motor.

238 Crosslinking was also observed between FliG and PomA in non-flagellated cells  
239 overexpressing soluble FliG, showing that stators freely diffusing in the cytoplasmic  
240 membrane interact with cytoplasmic FliG that is not assembled into a C-ring. Once the  
241 C-ring forms, FliG molecules in the C-ring do not exchange with cytoplasmic FliG  
242 monomers (53). Therefore, it is unlikely that the stator unit binds to the cytoplasmic FliG  
243 before the stator-FliG complex assembles into the motor. This result implies that a  
244 region around K89 is the first site in PomA to have access to FliG assembled into the  
245 rotor. Since PomA with *pBPA* replacing R88 in the chimeric PomA/PotB stator conferred  
246 a severe motility defect, we speculate that the stator complex containing PomA with  
247 *pBPA* replacing R88 assembles poorly into the motor. Previous studies too have  
248 suggested that the region around PomA R88 and K89 seems to be important for stator  
249 assembly into the motor rather than for torque generation (24, 25).

250 We found that the conserved motif RxxGΦΦxLE, which spans the region from  
251 PomA R88 to PomA E96, is important for motility (Fig. S1A). The motif contains a  
252 completely conserved G91 residue followed by two hydrophobic residues (Φ). Leucine  
253 (or less often isoleucine) at residue 95 is also highly conserved, and when it was  
254 replaced with *pBPA*, motility was abolished, suggesting that an aliphatic residue at this  
255 position is important for motor rotation. The hydrophobic residues F92 and L93 as well  
256 as the charged residues seem to contribute to the stator-rotor interaction. PomA with

257 *p*BPA replacing L93 still supported motility, whereas the PomA L93C mutant did not  
258 support motility, suggesting that hydrophobicity at residue 93 is important for motor  
259 function. We showed the strong disulfide-crosslinking between *Vibrio* PomA K89C and  
260 *E. coli* FliG R281C or D288C. This result is consistent with the idea that electrostatic  
261 repulsion and attraction, respectively, between K89 in PomA and R281 and D288  
262 contribute to torque generation. However, the residue at the position corresponding to  
263 K89 in PomA is Q in *E. coli* and *Salmonella* MotA, suggesting that these electrostatic  
264 interactions are not essential for motility in all cases. Overall, it seems that both  
265 electrostatic and hydrophobic interactions between the stator and rotor contribute to  
266 torque generation.

267 The three-dimensional structure at atomic resolution of the A subunit has been  
268 revealed by two independent groups (43, 44). The PDB structural data for MotA/MotB in  
269 *C. jejuni* were kindly supplied by Dr. Taylor before being available to the general public  
270 (Fig. 6). The residues corresponding to L76, I77, I80, A84, L95, N102 and F104, at  
271 which substitution with *p*BPA led to a complete loss of motility, were at positions internal  
272 to the MotA structure, suggesting that they are important for proper folding and stability.  
273 The residues corresponding to D85, R88, K89, G90, F92, L93 and E96 in PomA, which  
274 showed photo-crosslinking with FliG when replaced with *p*BPA, were arrayed on helices  
275 H1 and H2 and the H1-H2 linker. These residues are located on the most external and  
276 membrane-distal portion of MotA/PomA bound to the B subunit (Fig. S1C). The  
277 crosslinking data indicate that this surface, which contains the RxxGΦΦxLE motif,  
278 interacts closely with FliG and is important for stator assembly and motor rotation.

279 The coupling ion for motility binds to an absolutely conserved aspartate residue in

280 the B subunit. Substitution of this residue with asparagine, the D24N replacement in  
281 *Vibrio*, PomA may mimic the electrically neutral protonated state of MotA/MotB or the  
282 Na<sup>+</sup>-bound state of PomA/PomB. Therefore, the stator with the D24N mutation may not  
283 undergo conformational changes accompanied by Na<sup>+</sup>-binding or Na<sup>+</sup>-release from the  
284 aspartate residue. The chimeric PomA/PotB stator with the D24N variant of PotB formed  
285 the more crosslinked product with FliG than the stator containing the wild-type form of  
286 PotB. This result may imply that the D24N stator interacts with FliG more stable than the  
287 wild-type stator due to less movement in the region of the A subunit that interacts with  
288 FliG. However, this increased crosslinking may also reflect interactions of PomA/PotB  
289 D24N freely diffusing in the cytoplasmic membrane with cytoplasmic FliG.

290 Because we detected the interaction between *E. coli* FliG and *Vibrio* PomA within *E.*  
291 *coli* cells using the chimeric stator system, we cannot rule out the unlikely possibility that  
292 the residues in PomA and FliG that we have identified are not in close proximity in *Vibrio*  
293 cells. Eliminating this uncertainty would require comprehensive disulfide-crosslinking  
294 experiments with cysteine-substituted PomA and FliG in *Vibrio*.

295 Recently, a rotational gear model for stator function has been proposed by several  
296 groups (43, 44, 54). A similar rotational model has been reported for ExbB/ExbD in the  
297 Ton molecular motor. ExbB/ExbD shares a weak homology with MotA/MotB and  
298 PomA/PomB (43-47, 55). In the rotational gear model, the A subunit pentamer rotates  
299 around the B subunit dimer, and this rotation transmits torque to the rotor via interaction  
300 with the FliG ring. Based on our results, we can suggest which residues at the PomA  
301 (MotA) interface with FliG are involved in the interaction. We predicted that PomA K89  
302 interacts with both R281 and D288 in *E. coli* FliG. We speculate that PomA residues

303 R88 and K89 first interact with FliG D288 (D308 in *Vibrio* FliG) during assembly of a  
304 stator unit into the motor. This interaction activates ion conduction through the stator  
305 (24) and brings PomA E96 close to FliG R281 (R301 in *Vibrio*). Next, the A subunit  
306 begins to rotate in response to ion influx. Finally, PomA residues R88 and K89 repel the  
307 positive charge of FliG R281, and PomA E96 repels the negative charge of FliG D288  
308 (D308 in *Vibrio*). As the stator rotation proceeds, the next PomA subunit interacts with  
309 the next FliG subunit on the C-ring (Fig. 6, S9). PomA residue L93 may also contribute  
310 to torque generation through hydrophobic interactions with FliG.

311 In summary, we provide the first biochemical evidence for close proximity of specific  
312 residues in the PomA/MotA stator with specific residues of FliG in the C-ring rotor. The  
313 presence of both charged and hydrophobic residues at these positions suggests that  
314 both electrostatic and hydrophobic interactions contribute to stator assembly and  
315 generation of rotation. These results provide insight into the fundamental molecular  
316 mechanisms of stator assembly around the rotor and torque generation within the  
317 flagellar motor.

318

## 319 **Materials and Methods.**

320 **Bacterial strains and plasmids.** The bacterial strains and plasmids are listed in Table  
321 S1. *E. coli* was cultured in LB broth [1% (w/v) bactotryptone, 0.5% (w/v) yeast extract,  
322 0.5% (w/v) NaCl], and TG broth [1% (w/v) bactotryptone, 0.5% (w/v) NaCl, 0.5% (w/v)  
323 glycerol]. Chloramphenicol was added to a final concentration of 25 µg/mL for *E. coli*.  
324 Ampicillin was added to a final concentration of 100 µg/mL for *E. coli*.

325

326 **Swimming assay in semi-soft agar.** *E. coli* RP6894 cells harboring both pYS3 and  
327 pEVOL-pBpF, or *E. coli* DFB245 cells harboring pTSK170, were plated on LB agar with  
328 antibiotics. A single colony from the LB plate was inoculated onto TG agar plates [TG  
329 containing 0.3% (w/v) bactoagar and 0.02% (w/v) arabinose] and incubated at 30 °C for  
330 24 hrs. For the dominant-negative experiment with PotB D24N, *E. coli* RP437 cells  
331 expressing PomA/PotB D24N were pre-cultured in LB broth with 0.2% (w/v) arabinose  
332 overnight at 30 °C, then 1 µL overnight cell culture was inoculated in TG semi-soft agar  
333 [TG containing 0.3% (w/v) bactoagar and 0.2% (w/v) arabinose] at 30 °C for 7 hrs.

334

335 **Photo-crosslinking experiment.** *E. coli* cells harboring two different plasmids, pEVOL-  
336 pBpF and a pBAD24-based plasmid, were cultured in TG broth containing 1 mM *p*-  
337 benzoyl-L-phenylalanine (*p*BPA) (Bachem AG, Switzerland) at 30 °C for 2 hrs from an  
338 initial OD<sub>600</sub> of 0.1. Arabinose was added to a final concentration of 0.02% (w/v) to  
339 express mutated tyrosyl-tRNA synthase, amber suppressor tRNA, and PomA/PotB  
340 and/or FliG, and further cultivated for 4 hrs. The cells were collected by centrifugation  
341 (3,400 × *g*, 5 min), resuspended in PBS buffer [137 mM NaCl, 2.7 mM KCl, 10 mM  
342 Na<sub>2</sub>HPO<sub>4</sub>, 1.76 mM KH<sub>2</sub>PO<sub>4</sub>], re-collected by centrifugation, and resuspended in PBS  
343 buffer. In the experiment shown in Fig. S7, we used sodium buffer [20 mM Tris-HCl pH  
344 8.0, 150 mM NaCl] or potassium buffer [20 mM Tris-HCl pH 8.0, 150 mM KCl] instead of  
345 PBS. UV irradiation was performed with a B-100AP UV lamp (Analytik Jena US, Upland,  
346 CA, USA) for 5 min. The cells were collected by centrifugation (3,400 × *g*, 5 min) and  
347 resuspended in sodium dodecyl sulfate (SDS) loading buffer [62.5 mM Tris-HCl pH 6.8,  
348 2% (w/v) SDS, 10% (w/v) glycerol, 0.01% (w/v) bromophenol blue] containing 5% (v/v)



349  $\beta$ -mercaptoethanol. The samples were separated by SDS-polyacrylamide gel  
350 electrophoresis (SDS-PAGE) and transferred to poly-vinylidene di-fluoride membrane.  
351 The proteins were detected using rabbit anti-PomA antibody and rabbit anti-*Salmonella*  
352 FliG antibody (a gift from Dr. Minamino at Osaka University). For the experiment shown  
353 in Figure 3, rabbit anti-*E. coli* FliG antibody (a gift from Dr. Blair at University of Utah)  
354 was used. The rabbit anti-*Salmonella* FliG antibody cross-reacts with *E. coli* FliG and  
355 can detect *E. coli* FliG at chromosomal levels.

356

357 **Purification of the hook-basal body complex.** The hook-basal body complex was  
358 isolated as described previously, with several modifications (8). After UV irradiation for  
359 photo-crosslinking, the cells were suspended in 100  $\mu$ L sucrose solution [0.5 M sucrose,  
360 50 mM Tris-HCl pH 8.0]. EDTA, lysozyme and DNase were added to final  
361 concentrations of 10 mM, 1 mg/mL and 1 mg/mL, respectively. The suspension was left  
362 on ice for 30 min, and then spheroplasts were lysed by adding Triton X-100 and MgSO<sub>4</sub>  
363 to final concentrations of 1% (w/v) and 15 mM, respectively. The lysate was then  
364 incubated on ice for 1 hr. After removal of the cell debris by centrifugation at 15,000  $\times$  g  
365 for 10 min, hook-basal bodies were precipitated by centrifugation at 60,000  $\times$  g for 60  
366 min. The precipitate was resuspended in the SDS-loading buffer.

367

368 **Disulfide-crosslinking experiment.** *E. coli* DFB245 strain harboring the pTSK170  
369 plasmid was cultured in TG broth containing arabinose at a final concentration of 0.02%  
370 (w/v) at 30 °C for 5 hrs from an initial OD<sub>600</sub> of 0.05. The cells were collected by  
371 centrifugation (3,400  $\times$  g, 5 min), resuspended in PBS buffer, collected by centrifugation,

372 and resuspended in PBS buffer. To form the disulfide crosslink, 1 mM copper  
373 phenanthroline was added to the cell suspension, which was then incubated for 5 min.  
374 To stop the crosslinking, 3 mM N-methylmaleimide was added to the cell suspension  
375 and further incubated for 5 min. The cells were then collected by centrifugation (3,400  
376 × g, 5 min) and suspended in the SDS-loading buffer without β-mercaptoethanol. The  
377 procedure for SDS-PAGE and immunoblotting was the same as that used in the photo-  
378 crosslinking experiment.

379

380

### 381 **Acknowledgments**

382 We thank Dr. Peter G. Schultz for the kind gift of pEVOL-pBpF for photo-crosslinking,  
383 Dr. Tohru Minamino for the kind gift of rabbit anti-*Salmonella* FliG antibody, Dr. David F.  
384 Blair for the kind gift of rabbit anti-*E. coli* FliG antibody, Dr. T. Yorimitsu for the  
385 construction of plasmid pTY801 and Dr. Nicholas M.I. Taylor for the kind gift of PDB  
386 data for MotA/MotB (6YKM, 6YKP and 6YKR) before it was available to the public. We  
387 thank Dr. Mike Manson for critical reading for the manuscript, and K. Maki, Y. Kawase  
388 and A. Abe for technical support. This work was supported in part by JSPS KAKENHI  
389 Grant Numbers 18K07108 (to H.T.), 16H04774 and 18K19293 (to S.K.), and 20H03220  
390 (to M.H.), and MEXT KAKENHI Grant Number 20H04864 (to H.T.).

391

392

### 393 **References**

394 1. Stewart AG, Laming EM, Sobti M, Stock D (2014) Rotary ATPases--dynamic  
395 molecular machines. *Curr Opin Struct Biol* **25**:40-48.

- 396 2. Nakanishi A, Kishikawa JI, Mitsuoka K, Yokoyama K (2019) Cryo-EM studies of  
397 the rotary H<sup>+</sup>-ATPase/synthase from *Thermus thermophilus*. *Biophys Physicobiol*  
398 **16**:140-146.
- 399 3. Macnab RM (2003) How bacteria assemble flagella. *Ann Rev Microbiol* **57**:77-  
400 100.
- 401 4. Terashima H, Kojima S, Homma M (2008) Flagellar motility in bacteria structure  
402 and function of flagellar motor. *Int Rev Cell Mol Biol* **270**:39-85.
- 403 5. Morimoto YV, Minamino T (2014) Structure and function of the bi-directional  
404 bacterial flagellar motor. *Biomolecules* **4**:217-234.
- 405 6. Takekawa N, Imada K, Homma M (2020) Structure and energy-conversion  
406 mechanism of bacterial Na<sup>+</sup>-driven flagellar motor. *Trends Microbiol* **28**:719-731.
- 407 7. Ueno T, Oosawa K, Aizawa SI (1992) M-Ring, S-ring and proximal rod of the  
408 flagellar basal body of *Salmonella-typhimurium* are composed of subunits of a  
409 single protein, FliF. *J Mol Biol* **227**:672-677.
- 410 8. Francis NR, Sosinsky GE, Thomas D, Derosier DJ (1994) Isolation,  
411 characterization and structure of bacterial flagellar motors containing the switch  
412 complex. *J Mol Biol* **235**:1261-1270.
- 413 9. Yamaguchi S, Aizawa S, Kihara M, Isomura M, Jones CJ, Macnab RM (1986)  
414 Genetic evidence for a switching and energy-transducing complex in the flagellar  
415 motor of *Salmonella typhimurium*. *J Bacteriol* **168**:1172-1179.
- 416 10. Lloyd SA, Tang H, Wang X, Billings S, Blair DF (1996) Torque generation in the  
417 flagellar motor of *Escherichia coli*: Evidence of a direct role for FliG but not for  
418 FliM or FliN. *J Bacteriol* **178**:223-231.

- 419 11. Thomas DR, Francis NR, Xu C, DeRosier DJ (2006) The three-dimensional  
420 structure of the flagellar rotor from a clockwise-locked mutant of *Salmonella*  
421 *enterica* serovar Typhimurium. *J Bacteriol* **188**:7039-7048.
- 422 12. Dean GD, Macnab RM, Stader J, Matsumura P, Burks C (1984) Gene sequence  
423 and predicted amino acid sequence of the *motA* protein, a membrane-associated  
424 protein required for flagellar rotation in *Escherichia coli*. *J Bacteriol* **159**:991-999.
- 425 13. Stader J, Matsumura P, Vacante D, Dean GE, Macnab RM (1986) Nucleotide  
426 sequence of the *Escherichia coli* MotB gene and site-limited incorporation of its  
427 product into the cytoplasmic membrane. *J Bacteriol* **166**:244-252.
- 428 14. Kojima S, Blair DF (2004) Solubilization and purification of the MotA/MotB  
429 complex of *Escherichia coli*. *Biochemistry* **43**:26-34.
- 430 15. Asai Y, Kojima S, Kato H, Nishioka N, Kawagishi I, Homma M (1997) Putative  
431 channel components for the fast-rotating sodium-driven flagellar motor of a  
432 marine bacterium. *J Bacteriol* **179**:5104-5110.
- 433 16. Sato K, Homma M (2000) Multimeric structure of PomA, the Na<sup>+</sup>-driven polar  
434 flagellar motor component of *Vibrio alginolyticus*. *J Biol Chem* **275**:20223-20228.
- 435 17. De Mot R, Vanderleyden J (1994) The C-terminal sequence conservation  
436 between OmpA-related outer membrane proteins and MotB suggests a common  
437 function in both gram- positive and gram-negative bacteria, possibly in the  
438 interaction of these domains with peptidoglycan. *Mol Microbiol* **12**:333-334.
- 439 18. Kojima S, Imada K, Sakuma M, Sudo Y, Kojima C, Minamino T, Homma M,  
440 Namba K (2009) Stator assembly and activation mechanism of the flagellar  
441 motor by the periplasmic region of MotB. *Mol Microbiol* **73**:710-718.

- 442 19. Zhu S, Takao M, Li N, Sakuma M, Nishino Y, Homma M, Kojima S, Imada K  
443 (2014) Conformational change in the periplasmic region of the flagellar stator  
444 coupled with the assembly around the rotor. *Proc Natl Acad Sci USA* **111**:13523-  
445 13528.
- 446 20. Leake MC, Chandler JH, Wadhams GH, Bai F, Berry RM, Armitage JP (2006)  
447 Stoichiometry and turnover in single, functioning membrane protein complexes.  
448 *Nature* **443**:355-358.
- 449 21. Reid SW, Leake MC, Chandler JH, Lo C-J, Armitage JP, Berry RM (2006) The  
450 maximum number of torque-generating units in the flagellar motor of *Escherichia*  
451 *coli* is at least 11. *Proc Natl Acad Sci USA* **103**:8066-8071.
- 452 22. Kojima S, Takao M, Almira G, Kawahara I, Sakuma M, Homma M, Kojima C,  
453 Imada K (2018) The helix rearrangement in the periplasmic domain of the  
454 flagellar stator B subunit activates peptidoglycan binding and ion influx. *Structure*  
455 **26**:590-598.
- 456 23. Zhu S, Nishikino T, Takekawa N, Terashima H, Kojima S, Imada K, Homma M,  
457 Liu J (2020) In situ structure of the *Vibrio* polar flagellum reveals a distinct outer  
458 membrane complex and its specific interaction with the stator. *J Bacteriol*  
459 **202**:e00592-19.
- 460 24. Morimoto YV, Nakamura S, Hiraoka KD, Namba K, Minamino T (2013) Distinct  
461 roles of highly conserved charged residues at the MotA-FliG interface in bacterial  
462 flagellar motor rotation. *J Bacteriol* **195**:474-481.
- 463 25. Takekawa N, Kojima S, Homma M (2014) Contribution of many charged residues  
464 at the stator-rotor interface of the Na<sup>+</sup>-driven flagellar motor to torque generation

- 465 in *Vibrio alginolyticus*. *J Bacteriol* **196**:1377-1385.
- 466 26. Blair DF, Berg HC (1990) The MotA protein of *E. coli* is a proton-conducting  
467 component of the flagellar motor. *Cell* **60**:439-449.
- 468 27. Sato K, Homma M (2000) Functional reconstitution of the Na<sup>+</sup>-driven polar  
469 flagellar motor component of *Vibrio alginolyticus*. *J Biol Chem* **275**:5718-5722.
- 470 28. Zhou J, Sharp LL, Tang HL, Lloyd SA, Billings S, Braun TF, Blair DF (1998)  
471 Function of protonatable residues in the flagellar motor of *Escherichia coli*: a  
472 critical role for Asp 32 of MotB. *J Bacteriol* **180**:2729-2735.
- 473 29. Sudo Y, Kitade Y, Furutani Y, Kojima M, Kojima S, Homma M, Kandori H (2009)  
474 Interaction between Na<sup>+</sup> ion and carboxylates of the PomA-PomB stator unit  
475 studied by ATR-FTIR spectroscopy. *Biochemistry* **48**:11699-11705.
- 476 30. Onoue Y, Iwaki M, Shinobu A, Nishihara Y, Iwatsuki H, Terashima H, Kitao A,  
477 Kandori H, Homma M (2019) Essential ion binding residues for Na<sup>+</sup> flow in stator  
478 complex of the *Vibrio* flagellar motor. *Sci Rep* **9**:11216.
- 479 31. Kojima S, Blair DF (2001) Conformational change in the stator of the bacterial  
480 flagellar motor. *Biochemistry* **40**:13041-13050.
- 481 32. Mino T, Nishikino T, Iwatsuki H, Kojima S, Homma M (2019) Effect of sodium ions  
482 on conformations of the cytoplasmic loop of the PomA stator protein of *Vibrio*  
483 *alginolyticus*. *J Biochem* **166**:331-341.
- 484 33. Tang H, Braun TF, Blair DF (1996) Motility protein complexes in the bacterial  
485 flagellar motor. *J Mol Biol* **261**:209-221.
- 486 34. Zhou JD, Lloyd SA, Blair DF (1998) Electrostatic interactions between rotor and  
487 stator in the bacterial flagellar motor. *Proc Natl Acad Sci USA* **95**:6436-6441.

- 488 35. Lloyd SA, Blair DF (1997) Charged residues of the rotor protein FliG essential for  
489 torque generation in the flagellar motor of *Escherichia coli*. *J Mol Biol* **266**:733-  
490 744.
- 491 36. Zhou JD, Blair DF (1997) Residues of the cytoplasmic domain of MotA essential  
492 for torque generation in the bacterial flagellar motor. *J Mol Biol* **273**:428-439.
- 493 37. Morimoto YV, Nakamura S, Kami-ike N, Namba K, Minamino T (2010) Charged  
494 residues in the cytoplasmic loop of MotA are required for stator assembly into the  
495 bacterial flagellar motor. *Mol Microbiol* **78**:1117-1129.
- 496 38. Yorimitsu T, Sowa Y, Ishijima A, Yakushi T, Homma M (2002) The systematic  
497 substitutions around the conserved charged residues of the cytoplasmic loop of  
498 Na<sup>+</sup>-driven flagellar motor component PomA. *J Mol Biol* **320**:403-413.
- 499 39. Yorimitsu T, Mimaki A, Yakushi T, Homma M (2003) The conserved charged  
500 residues of the C-terminal region of FliG, a rotor component of Na<sup>+</sup>-driven  
501 flagellar motor. *J Mol Biol* **334**:567-583.
- 502 40. Yakushi T, Yang J, Fukuoka H, Homma M, Blair DF (2006) Roles of charged  
503 residues of rotor and stator in flagellar rotation: comparative study using H<sup>+</sup>-  
504 driven and Na<sup>+</sup>-driven motors in *Escherichia coli*. *J Bacteriol* **188**:1466-1472.
- 505 41. Yonekura K, Maki-Yonekura S, Homma M (2011) The structure of the flagellar  
506 motor protein complex PomAB: Implications for the torque-generating  
507 conformation. *J Bacteriol* **193**:3863-3870.
- 508 42. Takekawa N, Terahara N, Kato T, Gohara M, Mayanagi K, Hijikata A, Onoue Y,  
509 Kojima S, Shirai T, Namba K, Homma M (2016) The tetrameric MotA complex as  
510 the core of the flagellar motor stator from hyperthermophilic bacterium. *Sci Rep*

- 511           **6:31526.**
- 512   43.   Santiveri M, Roa-Eguiara A, Kühne C, Wadhwa N, Hu H, Berg HC, Erhardt M,  
513       Taylor NMI (2020) Structure and function of stator units of the bacterial flagellar  
514       motor. *Cell* **183**:244-257.
- 515   44.   Deme JC, Johnson S, Vickery O, Aron A, Monkhouse H, Griffiths T, Hennell  
516       James R, Berks BC, Coulton JW, Stansfeld PJ, Lea SM (2020) Structures of the  
517       stator complex that drives rotation of the bacterial flagellum. *Nat Microbiol*  
518       **5**:1553-1564.
- 519   45.   Celia H, Noinaj N, Zakharov SD, Bordignon E, Botos I, Santamaria M, Barnard  
520       TJ, Cramer WA, Lloubes R, Buchanan SK (2016) Structural insight into the role  
521       of the Ton complex in energy transduction. *Nature* **538**:60-65.
- 522   46.   Maki-Yonekura S, Matsuoka R, Yamashita Y, Shimizu H, Tanaka M, Iwabuki F,  
523       Yonekura K (2018) Hexameric and pentameric complexes of the ExbBD  
524       energizer in the Ton system. *eLife* **7**:e35419.
- 525   47.   Celia H, Botos I, Ni X, Fox T, De Val N, Lloubes R, Jiang J, Buchanan SK (2019)  
526       Cryo-EM structure of the bacterial Ton motor subcomplex ExbB-ExbD provides  
527       information on structure and stoichiometry. *Commun Biol* **2**:358.
- 528   48.   Chin JW, Martin AB, King DS, Wang L, Schultz PG (2002) Addition of a  
529       photocrosslinking amino acid to the genetic code of *Escherichia coli*. *Proc Natl*  
530       *Acad Sci USA* **99**:11020-11024.
- 531   49.   Asai Y, Yakushi T, Kawagishi I, Homma M (2003) Ion-coupling determinants of  
532       Na<sup>+</sup>-driven and H<sup>+</sup>-driven flagellar motors. *J Mol Biol* **327**:453-463.
- 533   50.   Nakamura S, Kami-ike N, Yokota JP, Minamino T, Namba K (2010) Evidence for



- 534 symmetry in the elementary process of bidirectional torque generation by the  
535 bacterial flagellar motor. *Proc Natl Acad Sci USA* **107**:17616-17620.
- 536 51. Nakamura S, Minamino T, Kami-Ike N, Kudo S, Namba K (2014) Effect of the  
537 MotB(D33N) mutation on stator assembly and rotation of the proton-driven  
538 bacterial flagellar motor. *Biophysics* **10**:35-41.
- 539 52. Fukuoka H, Yakushi T, Homma M (2004) Concerted effects of amino acid  
540 substitutions in conserved charged residues and other residues in the  
541 cytoplasmic domain of PomA, a stator component of Na<sup>+</sup>-driven flagella. *J*  
542 *Bacteriol* **186**:6749-6758.
- 543 53. Fukuoka H, Yakushi T, Kusumoto A, Homma M (2005) Assembly of motor  
544 proteins, PomA and PomB, in the Na<sup>+</sup>-driven stator of the flagellar motor. *J Mol*  
545 *Biol* **351**:707-717.
- 546 54. Chang Y, Zhang K, Carroll BL, Zhao X, Charon NW, Norris SJ, Motaleb MdA, Li  
547 C, Liu J (2020) Molecular Mechanism for Rotational Switching of the Bacterial  
548 Flagellar Motor. *Nat Struct Mol Biol* **27**:1041–1047.
- 549 55. Celia H, Noinaj N, Buchanan SK (2020) Structure and Stoichiometry of the Ton  
550 Molecular Motor. *Int J Mol Sci* **21**:375.
- 551 56. Nishikino T, Hijikata A, Miyanoiri Y, Onoue Y, Kojima S, Shirai T, Homma M  
552 (2018) Rotational direction of flagellar motor from the conformation of FliG middle  
553 domain in marine *Vibrio*. *Sci Rep* **8**:17793.
- 554 57. Grant SG, Jessee J, Bloom FR, Hanahan D (1990) Differential plasmid rescue  
555 from transgenic mouse DNAs into *Escherichia coli* methylation-restriction  
556 mutants. *Proc Natl Acad Sci USA* **87**:4645–4649.

- 557 58. Parkinson JS (1978) Complementation analysis and deletion mapping of  
558 *Escherichia coli* mutants defective in chemotaxis. *J Bacteriol* **135**:45-53.
- 559 59. Braun TF, Poulson S, Gully JB, Empey JC, Van Way S, Putnam A, Blair DF  
560 (1999) Function of proline residues of MotA in torque generation by the flagellar  
561 motor of *Escherichia coli*. *J Bacteriol* **181**:3542-3551.
- 562 60. Slocum MK, Parkinson JS (1983) Genetics of methyl-accepting chemotaxis  
563 proteins in *Escherichia coli*: organization of the tar region. *J Bacteriol* **155**:565-  
564 577.
- 565 61. Guzman LM, Belin D, Carson MJ, Beckwith J (1995) Tight regulation, modulation,  
566 and high-level expression by vectors containing the arabinose pBAD promoter. *J*  
567 *Bacteriol* **177**:4121-4130.
- 568

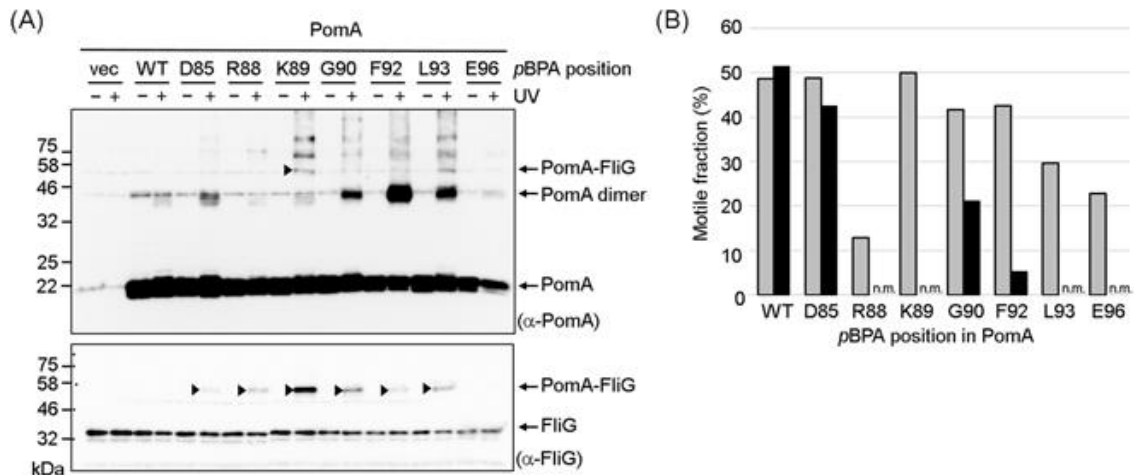

569 **Fig. 1.** Photo-crosslinking between plasmid-encoded *Vibrio* PomA and endogenous *E.*  
570 *coli* FliG. (A) *Vibrio* PomA and chimeric PotB were expressed from plasmid pYS3, and  
571 the amber suppressor tRNA and the mutated tyrosyl-tRNA synthase were expressed  
572 from plasmid pEVOL-pBpF in the *E. coli*  $\Delta$ *motAB* strain, RP6894. After photo-  
573 crosslinking, whole-cell lysates were prepared and analyzed using immunoblotting. The  
574 upper and lower panels show immunoblot images produced with anti-PomA and anti-  
575 FliG antibodies, respectively. The crosslinked products are indicated by black  
576 arrowheads. We showed the image of the photo-crosslinked product of PomA E96pBPA  
577 in Fig. S3C because we could not detect it in this immunoblot. Bands with higher  
578 molecular weight were derived from non-specific crosslinking between stator units or  
579 non-specific crosslinking of PomA with other proteins. (B) The motile fraction of *E. coli*  
580 RP6894 cells expressing PomA/PotB before and after UV irradiation in free-swimming.  
581 The gray box shows the motile fraction before UV irradiation. The black box shows the  
582 motile fraction after UV irradiation. At least 30 freely suspended cells were analyzed for  
583 each mutant with dark-field microscopy. Abbreviations: n.m., nonmotile.  
584

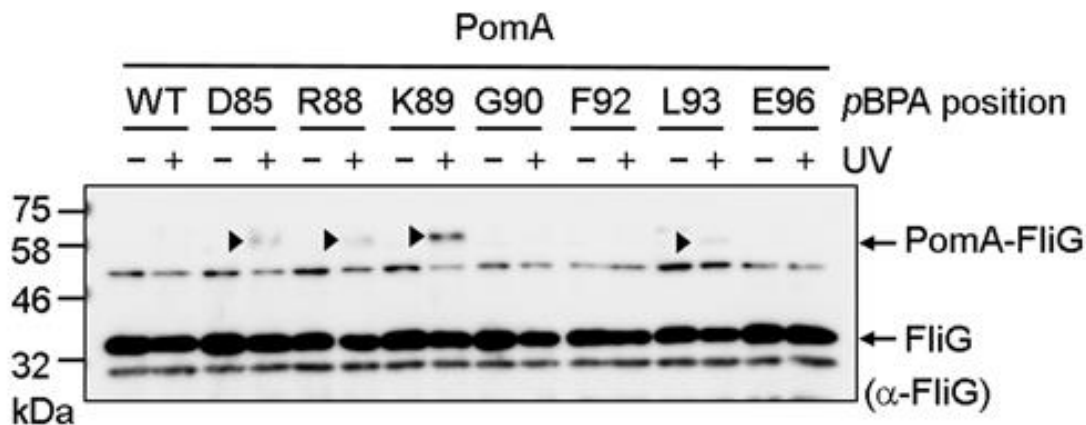

585 **Fig. 2.** Photo-crosslinking between plasmid-borne *Vibrio* PomA and endogenous *E. coli*  
586 FliG in the isolated hook-basal body. *Vibrio* PomA and chimeric PotB were expressed  
587 from plasmid pYS3, and the amber suppressor tRNA and the mutated tyrosyl-tRNA  
588 synthase were expressed from plasmid pEVOL-pBpF in the *E. coli*  $\Delta$ *motAB* strain  
589 RP6894. The panel shows immunoblot images visualized with an anti-FliG antibody.  
590 The crosslinked products are indicated by black arrowheads.  
591

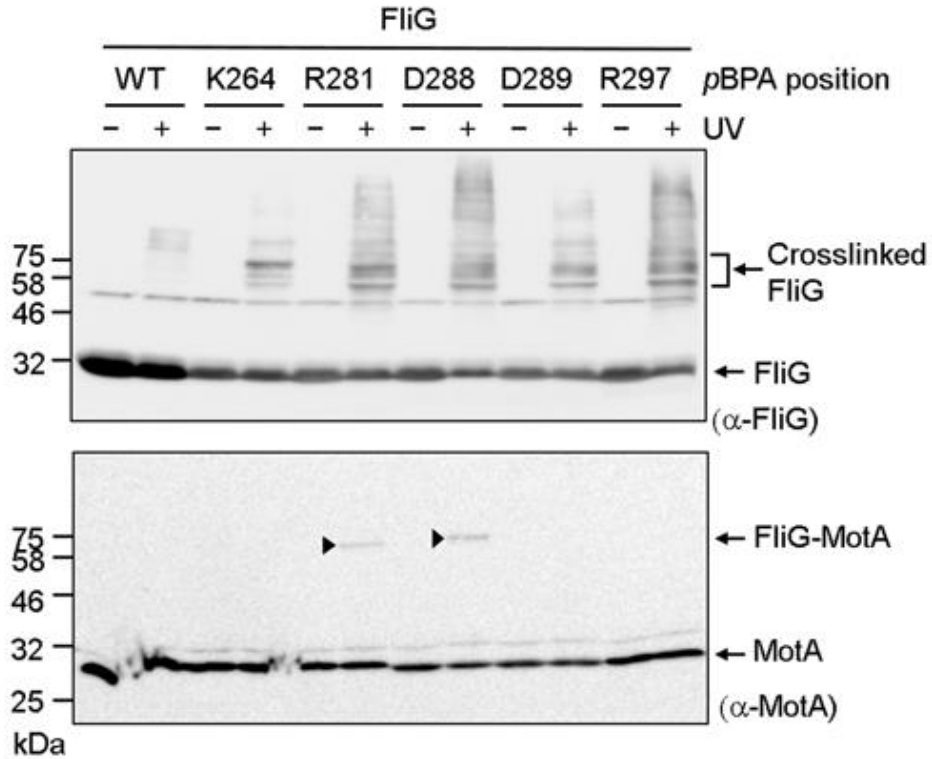

592 **Fig. 3.** Photo-crosslinking between plasmid-borne *E. coli* FliG and endogenous *E. coli*  
593 MotA. *E. coli* FliG was expressed from plasmid pTY801, and the amber suppressor  
594 tRNA and the mutated tyrosyl-tRNA synthase were expressed from plasmid pEVOL-  
595 pBpF in the *E. coli*  $\Delta fliG$  strain DFB225. The upper and lower panels show immunoblot  
596 images made using anti-MotA and anti-*E. coli* FliG antibodies, respectively. The  
597 crosslinked products are indicated by black arrowheads. Bands with higher molecular  
598 weight in the immunoblot with anti-FliG antibody were derived from non-specific  
599 interactions of FliG with other proteins.  
600

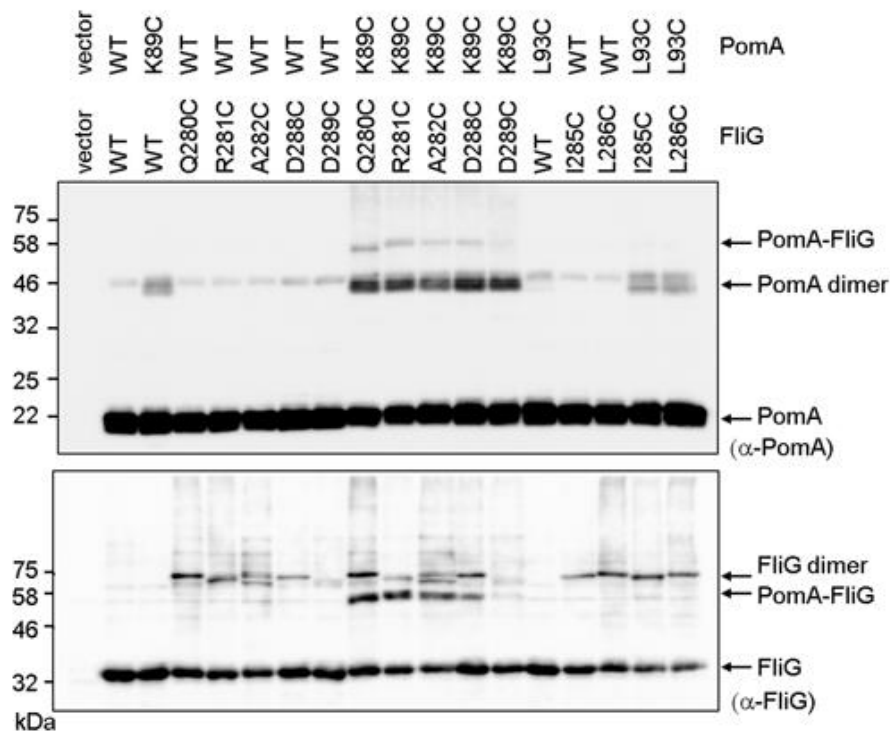

601 **Fig. 4.** Disulfide-crosslinking between plasmid-borne *Vibrio* PomA and *E. coli* FliG.  
602 *Vibrio* PomA, chimeric PotB and *E. coli* FliG were co-expressed from plasmid pTSK170  
603 in the *E. coli*  $\Delta$ *motA* $\Delta$ *fliG* strain DFB245. The upper and lower panels show immunoblot  
604 images made using anti-PomA and anti-FliG antibodies, respectively.  
605

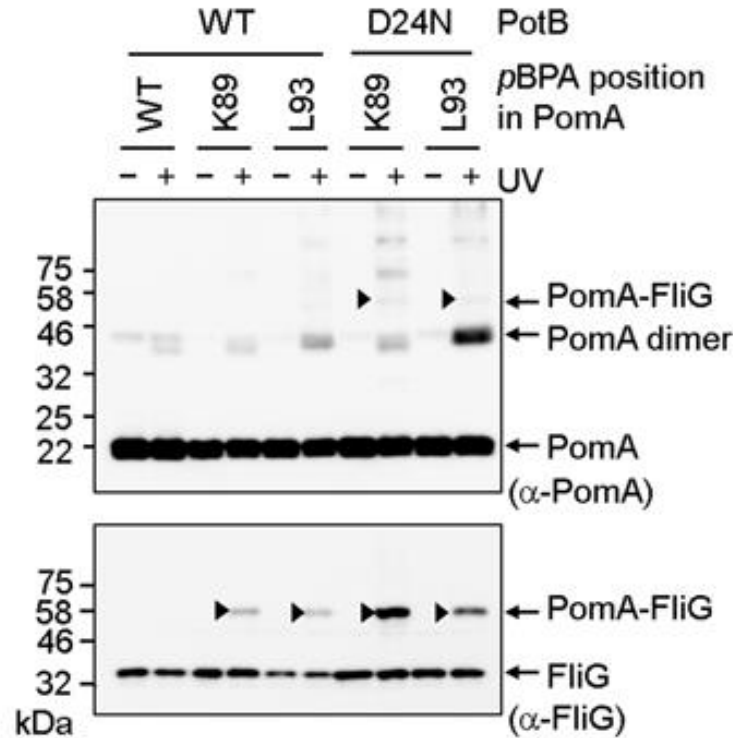

606 **Fig. 5.** Photo-crosslinking between plasmid-borne *Vibrio* PomA and endogenous *E. coli*  
 607 FliG in the presence of PotB D24N. *Vibrio* PomA and chimeric PotB were expressed  
 608 from plasmid pYS3, and the amber suppressor tRNA and the mutated tyrosyl-tRNA  
 609 synthase were expressed from plasmid pEVOL-pBpF in the *E. coli*  $\Delta$ *motAB* strain  
 610 RP6894. The upper and lower panels show immunoblot images of whole-cell lysates  
 611 made using anti-PomA and anti-FliG antibodies, respectively. The crosslinked products  
 612 are indicated by black arrowheads.  
 613

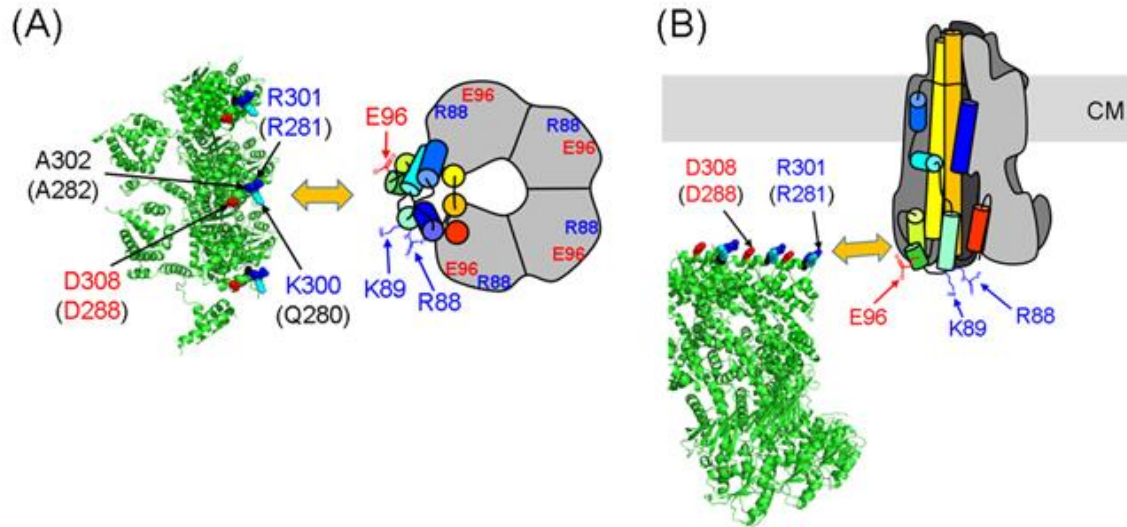

614 **Fig. 6.** A model for the interaction between the C-ring and PomA from a top view (A)  
615 and a side view (B). The model incorporates a schematic of the PomA pentamer based  
616 on the cryo-EM structure (43). One PomA subunit is shown in rainbow color, and the  
617 other four PomA subunits are outlined in gray. The C-ring of *Vibrio alginolyticus* is based  
618 on a model previously reported (56). The positions of R88, K89 and E96 are indicated  
619 by arrows. FliG residues K300, R301 and A302 in *Vibrio*, corresponding to residues  
620 Q280, R281 and A282 in *E. coli* (the residue numbers for *E. coli* FliG are given in  
621 brackets), are shown as cyan, blue and red spheres, respectively. CM: cytoplasmic  
622 membrane.  
623



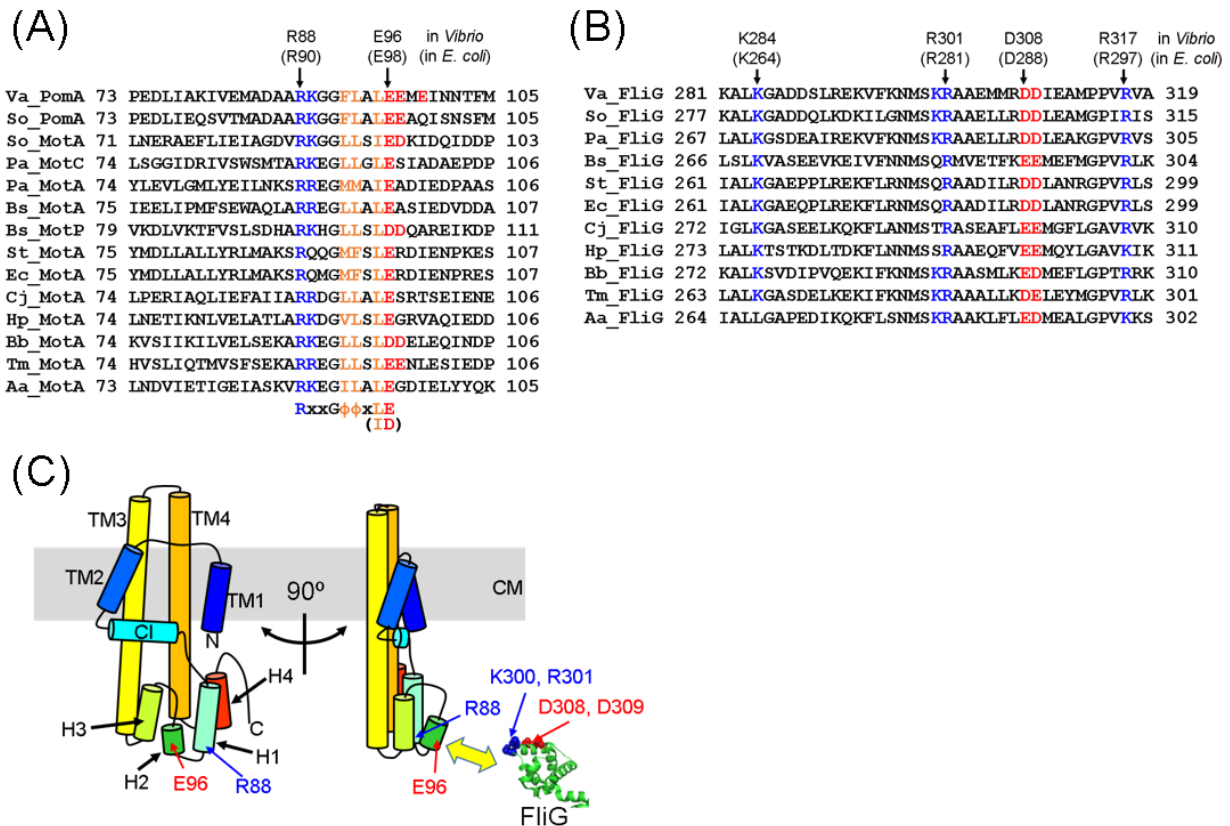

624 **Fig. S1.** (A, B) Alignments of the amino acid sequences of PomA and MotA (A) and FliG  
625 (B) from various species. The charged residues thought to be important for the motor  
626 function were shown in blue (positive) and red (negative). The conserved hydrophobic  
627 residues in the RxxGΦΦxLE motif were shown in orange. Abbreviations: Φ,  
628 hydrophobic residues; Va, *Vibrio alginolyticus* VIO5; So, *Shewanella oneidensis* MR-1;  
629 Pa, *Pseudomonas aeruginosa* PAO1; Bs, *Bacillus subtilis* subsp. *subtilis* 168; St,  
630 *Salmonella enterica* subsp. *enterica* serovar *Typhimurium* LT2; Ec, *Escherichia coli* K-12  
631 MG1655; Cj, *Campylobacter jejuni* subsp. *jejuni* NCTC 11168; Hp, *Helicobacter pylori*  
632 26695; Bb, *Borrelia burgdorferi* B31; Tm, *Thermotoga maritima* MSB8; Aa, *Aquifex*  
633 *aeolicus* VF5. (C) The schematic drawing of the PomA monomer based on the cryo-EM  
634 structure of *C. jejuni* MotA/MotB complex (43). It was shown as a cartoon model in  
635 rainbow color. The mutations were introduced in H1, H1-H2 linker, H2 and H2-H3 linker.

636 The C-terminal region of FliG from *A.aeolicus* was shown as a cartoon model (PDB ID:  
637 3HJL). The important charged residues corresponding to *Vibrio* FliG K300, R301, D308  
638 and D309, were shown in blue (positive) and red (negative) spheres. TM1~TM4:  
639 transmembrane segments, CI: cytosolic interface helix, H1~H4: cytosolic helices.  
640

PomA mutants incorporated *pBPA*

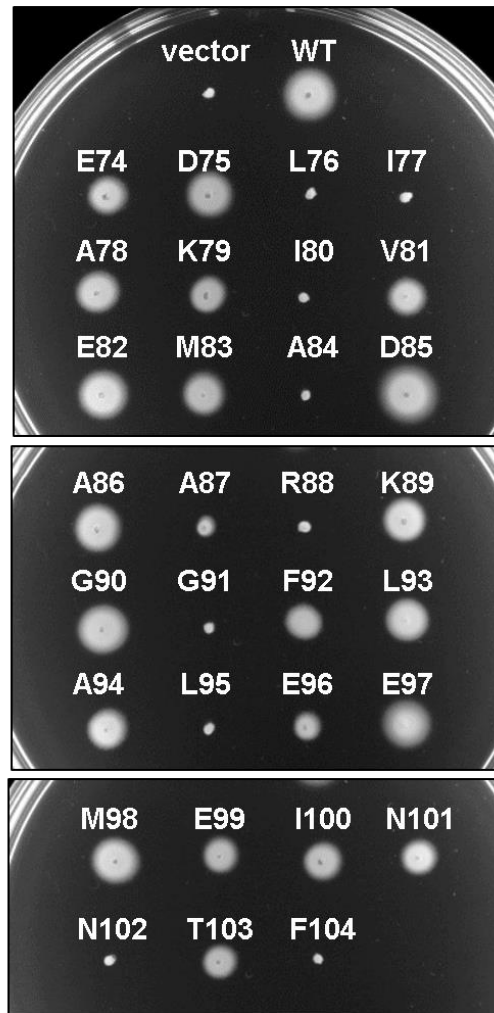

641 **Fig. S2.** Motility of *E. coli*  $\Delta$ *motAB* cells expressing *pBPA*-incorporated *Vibrio* PomA and  
642 chimeric PotB in a soft-agar plate. The cells were inoculated in TG 0.3% (w/v) bactoagar  
643 with 0.02% (w/v) arabinose plate at 30 °C for 24 hrs. The *E. coli*  $\Delta$ *motAB* strain is  
644 RP6894. The vector plasmid is pBAD24. PomA/PotB were expressed from pYS3 that  
645 harbors *pomA* and *potB* genes in pBAD24 backbone. *pBPA*-incorporation into an amber  
646 codon was carried out by the amber suppressor tRNA and the mutated tyrosyl-tRNA  
647 synthase expressed from pEVOL-pBpF.  
648

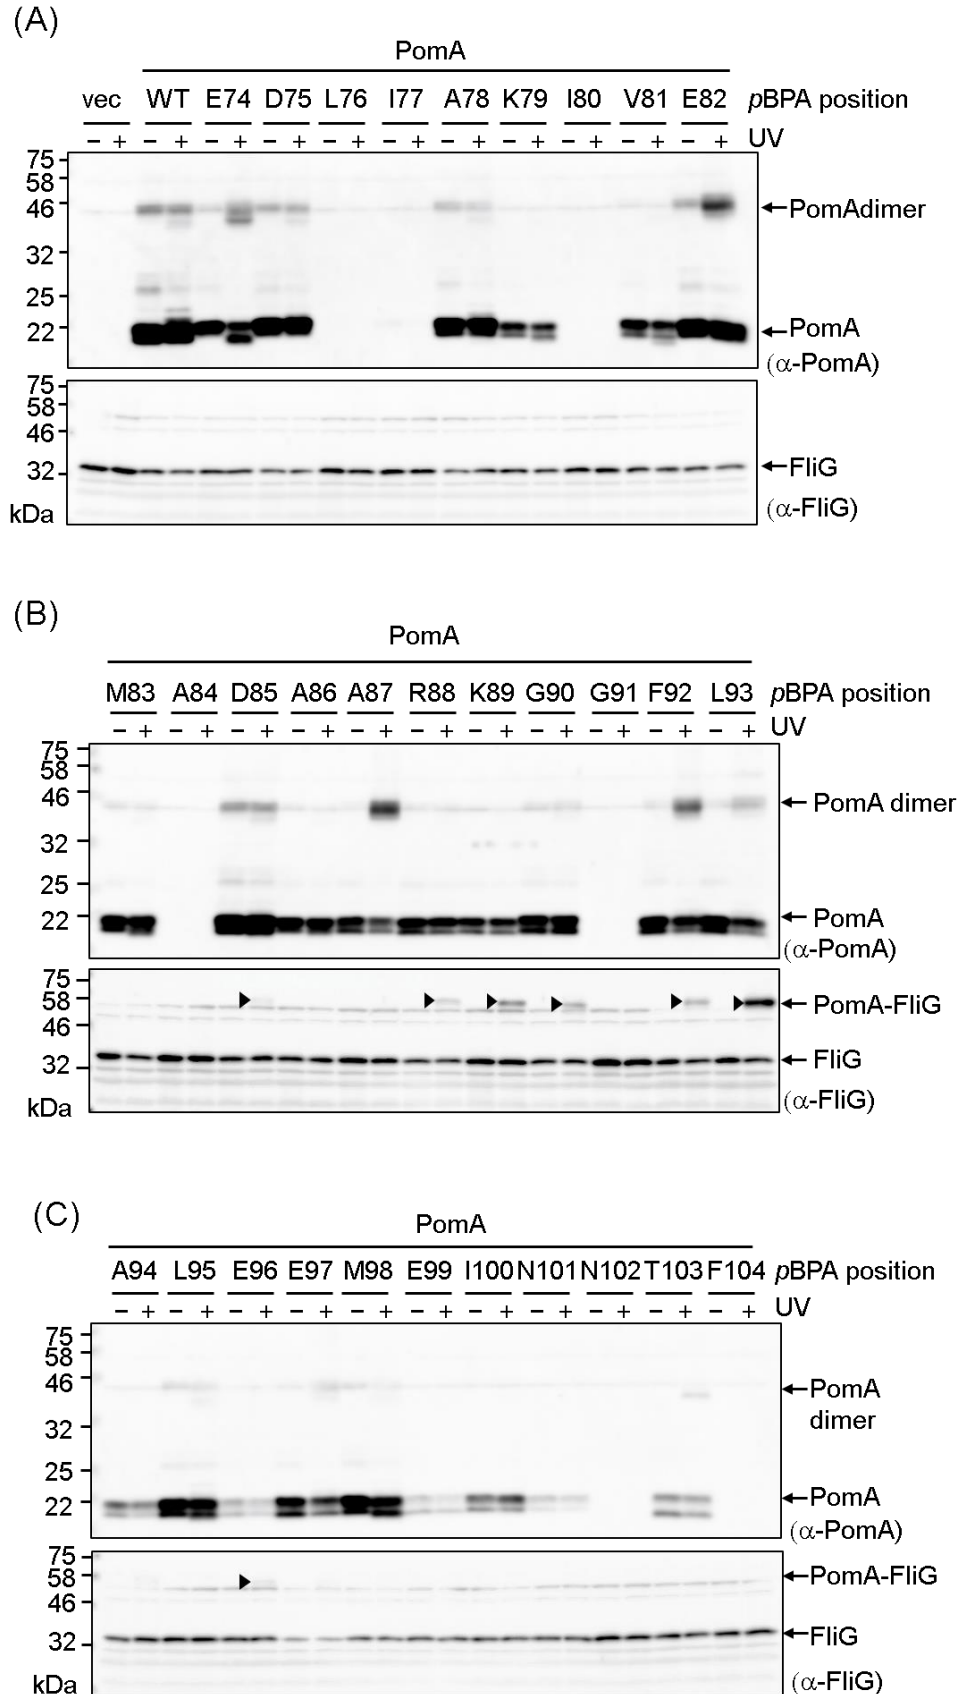

649 **Fig. S3.** Protein expression of *pBPA*-introduced, plasmid-borne *Vibrio* PomA and photo-

650 crosslinking between those PomA and endogenous *E. coli* FliG (A-C). SDS-PAGE  
651 samples were prepared from whole cell lysates. *Vibrio* PomA and chimeric PotB were  
652 expressed from plasmid pYS3, and the amber suppressor tRNA and the mutated  
653 tyrosyl-tRNA synthase were expressed from plasmid pEVOL-pBpF, in the *E. coli*  
654  $\Delta motAB$  strain, RP6894. Upper and lower panels showed immunoblot images by using  
655 anti-PomA and anti-FliG antibodies, respectively. The crosslinked products were marked  
656 by black arrow head.  
657

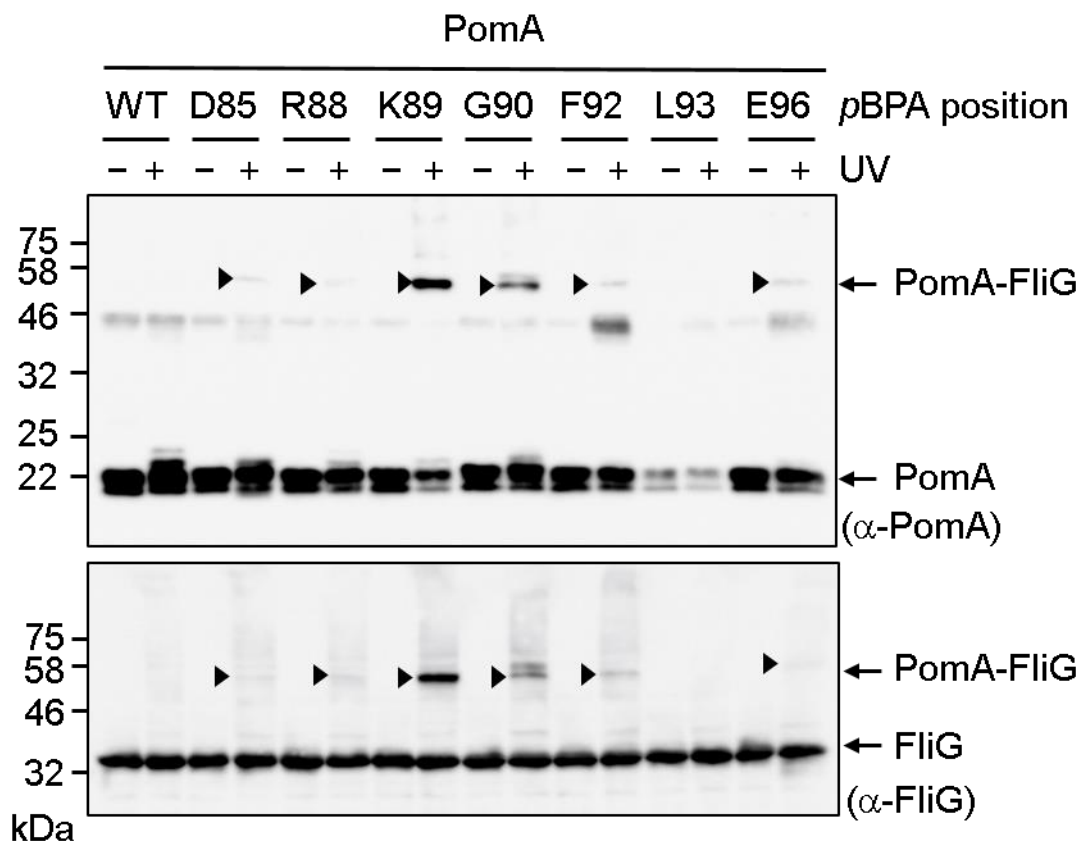

658 **Fig. S4.** Photo-crosslinking between plasmid-borne *Vibrio* PomA and *E. coli* FliG in the  
659 *E. coli*  $\Delta flhDC$  strain, RP3098. *E. coli* FliG, *Vibrio* PomA, chimeric PotB and *E. coli*  
660 FliG were co-expressed from plasmid pTSK170, and the amber suppressor tRNA and  
661 the mutated tyrosyl-tRNA synthase were expressed from plasmid pEVOL-pBpF. Upper  
662 and lower panels showed immunoblot images by using anti-PomA and anti-FliG  
663 antibodies, respectively. The crosslinked products were marked by black arrow head.  
664

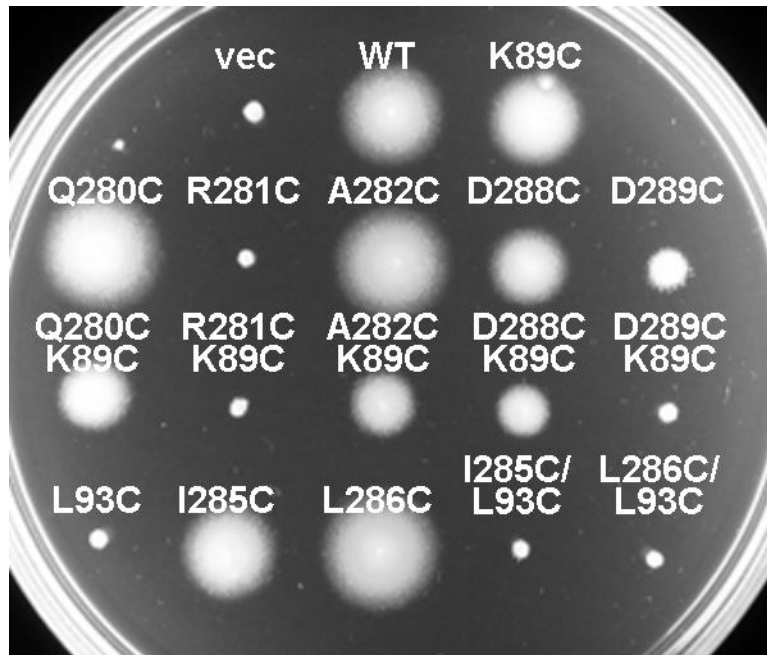

665 **Fig. S5.** Motility of *E. coli*  $\Delta$ *motA* $\Delta$ *fliG* cells expressed *Vibrio* PomA, and chimeric PotB  
666 and *E. coli* FliG in a soft-agar plate. The cells were inoculated in TG 0.3% (w/v)  
667 bactoagar with 0.02% (w/v) arabinose plate, and incubated at 30 °C for 24 hrs. The *E.*  
668 *coli*  $\Delta$ *motA* $\Delta$ *fliG* strain is DFB245. The vector plasmid is pBAD24. PomA, PotB and FliG  
669 were expressed from pTSK170, in which *pomA*, *potB* and *fliG* genes were cloned into  
670 pBAD24.  
671

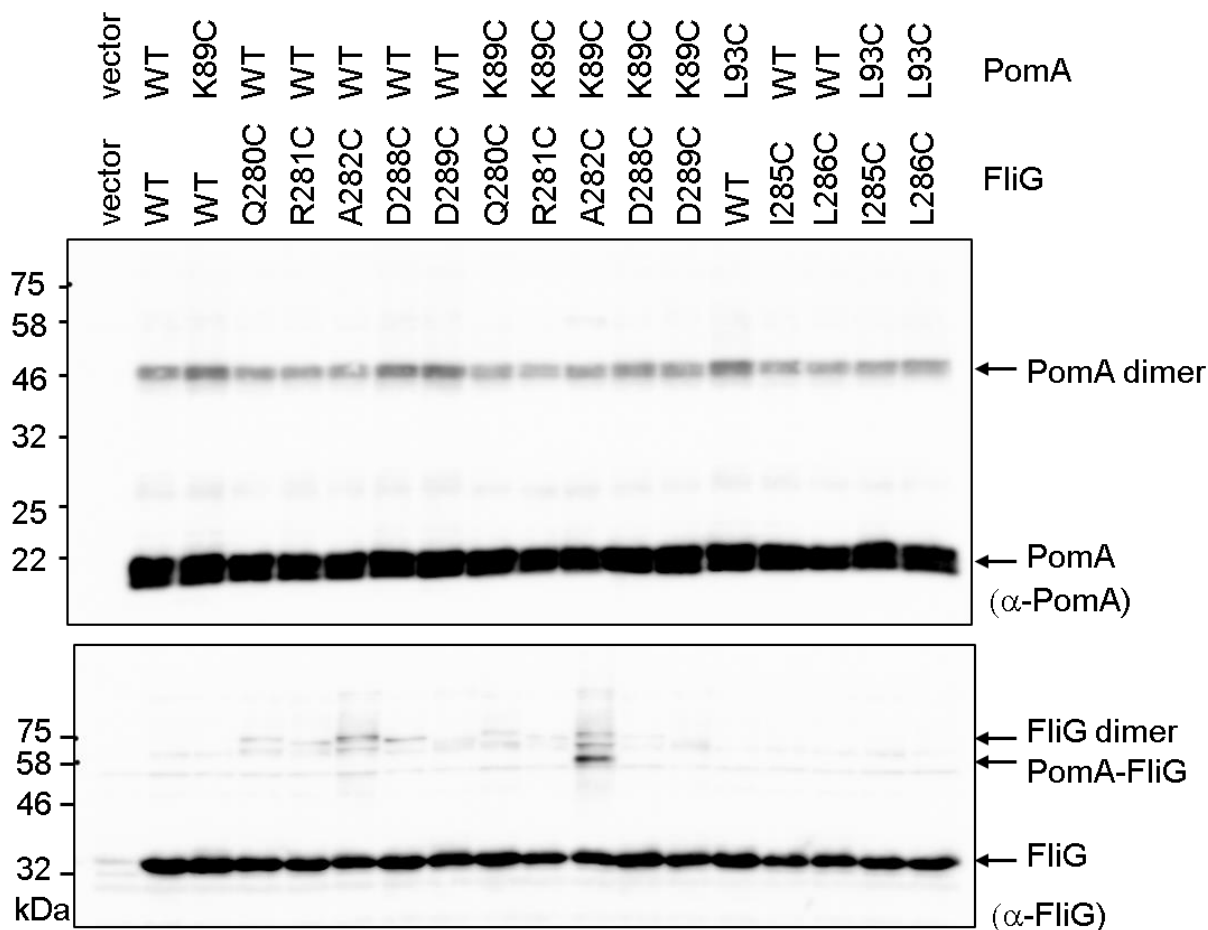

672 **Fig. S6.** Immunoblotting of the disulfide crosslinked samples with reduced treatment by  
673  $\beta$ -mercaptoethanol. *Vibrio* PomA, chimeric PotB and *E. coli* FliG were expressed from  
674 plasmid pTSK170, in the *E. coli*  $\Delta$ motA $\Delta$ fliG strain, DFB245. Upper and lower panels  
675 showed immunoblot images by using anti-PomA and anti-FliG antibodies, respectively.  
676 A small amount of the crosslink product of FliG A282C/PomA K89C was detected even  
677 upon treatment with reducing agent.

678



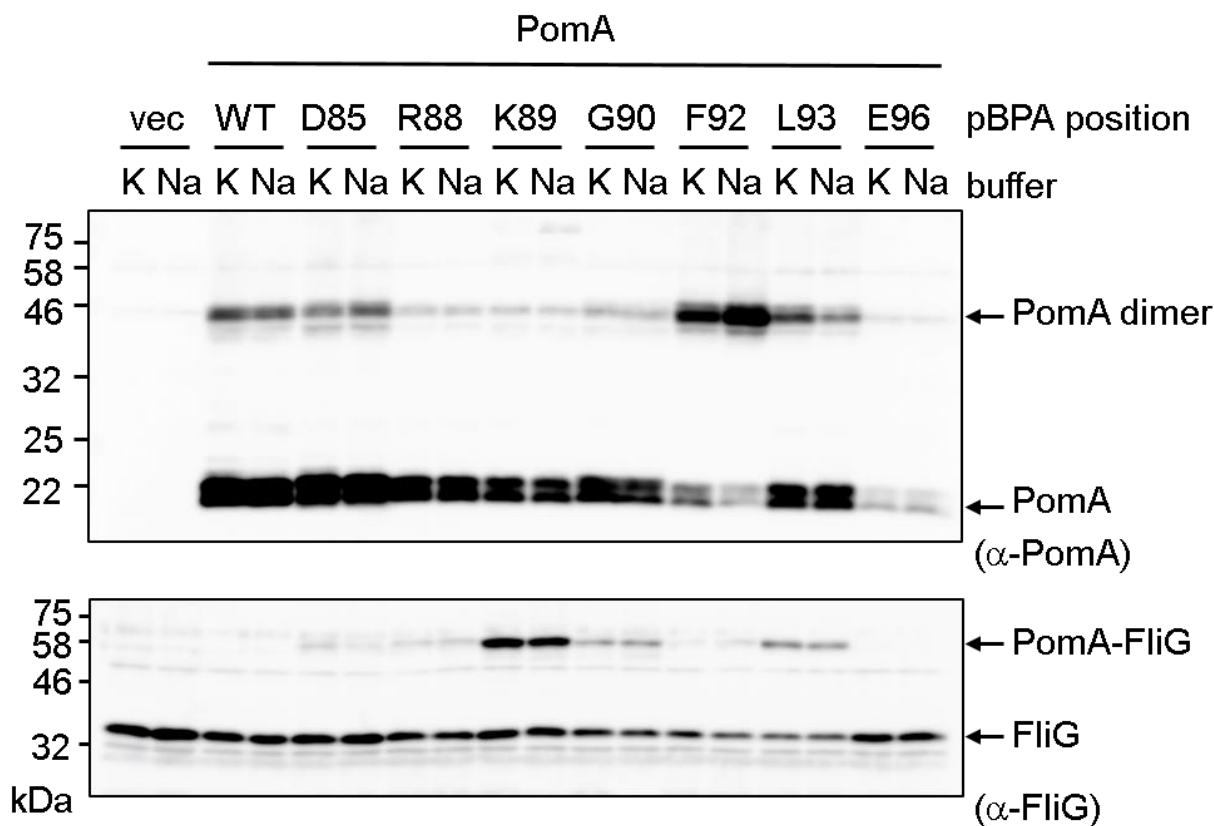

679 **Fig. S7.** Photo-crosslinking between plasmid-borne *Vibrio* PomA and endogenous *E.*  
680 *coli* FliG in the presence of sodium buffer or potassium buffer. *Vibrio* PomA and chimeric  
681 PotB were expressed from plasmid pYS3, and the amber suppressor tRNA and the  
682 mutated tyrosyl-tRNA synthase were expressed from plasmid pEVOL-pBpF, into the *E.*  
683 *coli*  $\Delta$ *motAB* strain, RP6894. Upper and lower panels showed immunoblot images by  
684 using anti-PomA and anti-FliG antibodies, respectively.  
685

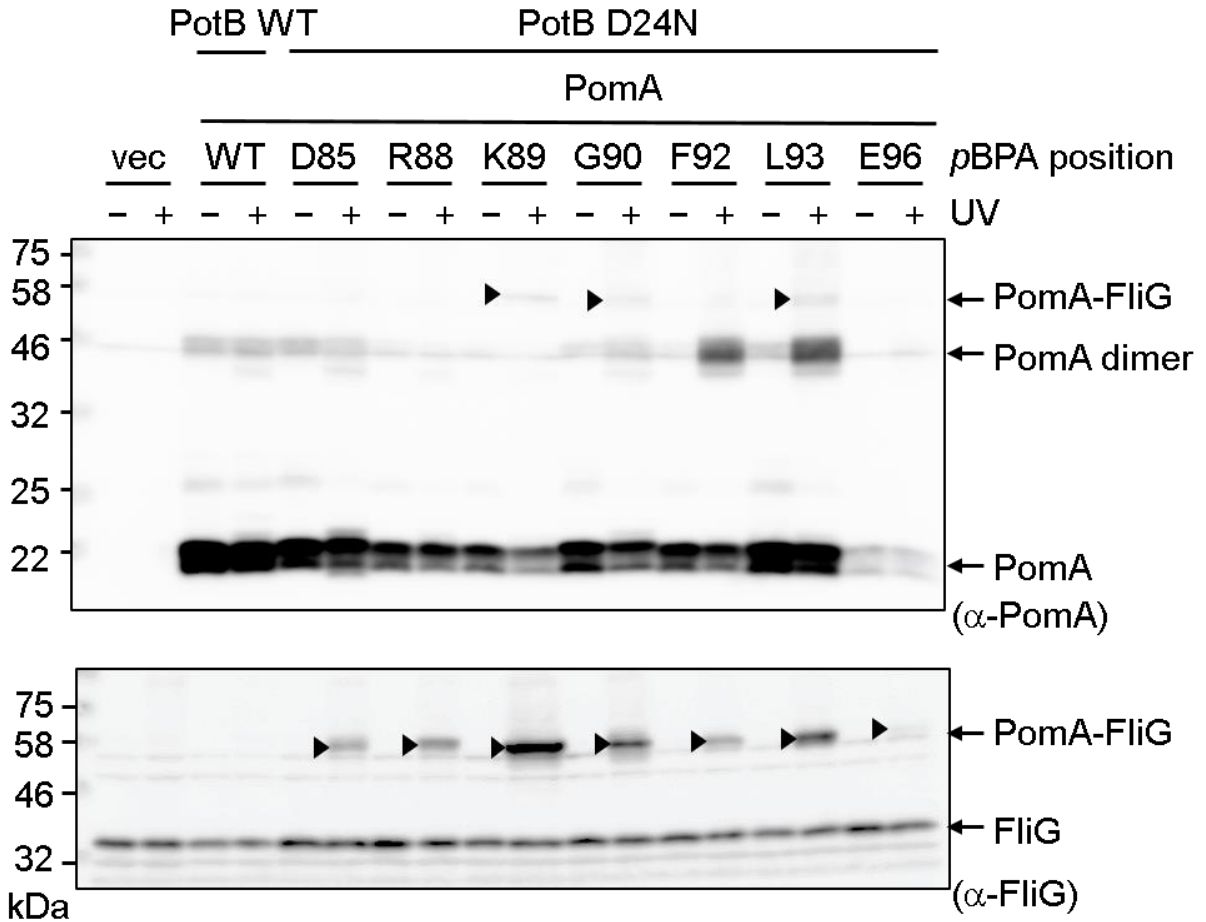

686 **Fig. S8.** Photo-crosslinking between plasmid-borne *Vibrio* PomA and endogenous *E.*  
687 *coli* FliG in the background of PotB D24N. *Vibrio* PomA and chimeric PotB were  
688 expressed from plasmid pYS3, and the amber suppressor tRNA and the mutated  
689 tyrosyl-tRNA synthase were expressed from plasmid pEVOL-pBpF, into the *E. coli*  
690  $\Delta$ *motAB* strain, RP6894. Upper and lower panels showed immunoblot images by using  
691 anti-PomA and anti-FliG antibodies, respectively. The crosslinked products were marked  
692 by black arrow head.

693

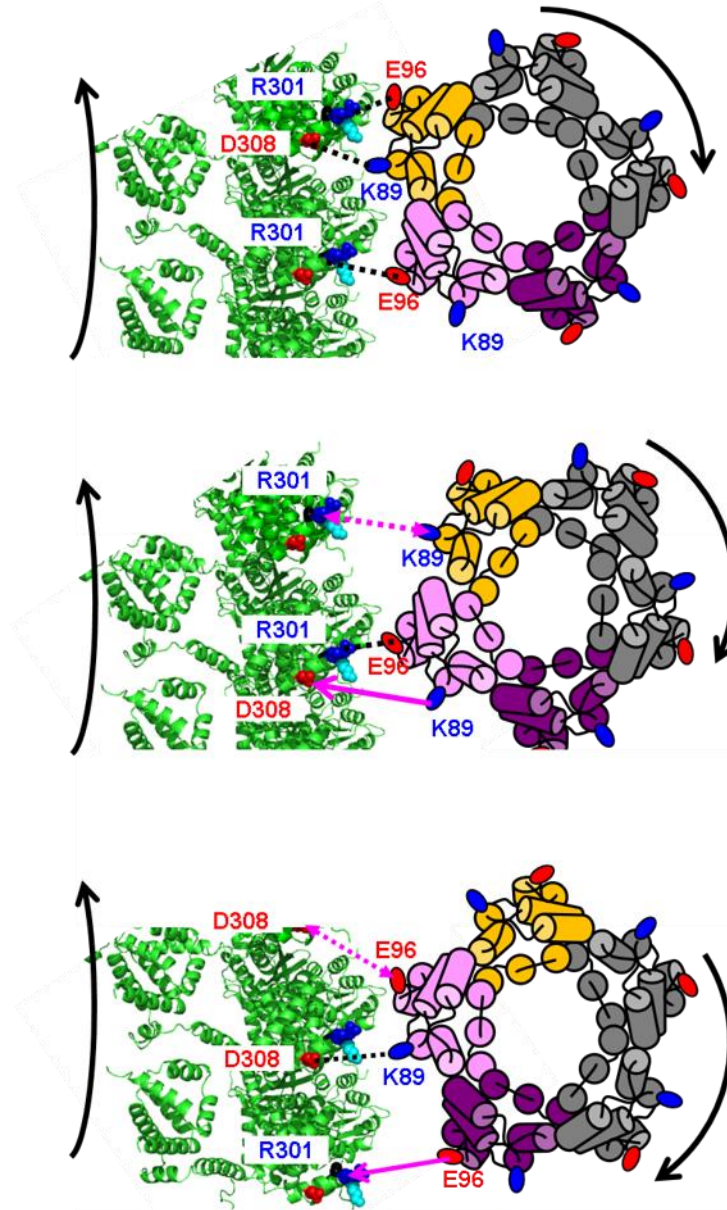

694 **Fig. S9.** The interaction model between C-ring and PomA. The schematic diagram of  
695 the PomA pentamer based on the cryo-EM structure (43) was shown from the top view.  
696 The C-ring model of *Vibrio alginolyticus* was based on the model previously reported  
697 (56) is shown from the top view. The positions of PomA K89 and E96 were shown in  
698 blue and red circles, respectively. FliG R301 and D308 in *Vibrio* corresponding to R281  
699 and D288 in *E. coli* were shown by space filling residues.

700

701 **Table S1.** Bacterial strains and plasmids used in this study

| Strain or plasmid | Genotype or description                                                                                                                                                                                       | Reference or source |
|-------------------|---------------------------------------------------------------------------------------------------------------------------------------------------------------------------------------------------------------|---------------------|
| <i>E. coli</i>    |                                                                                                                                                                                                               |                     |
| DH5 $\alpha$      | F <sup>-</sup> $\Phi$ 80d <i>lacZ</i> $\Delta$ M15 $\Delta$ ( <i>lacZYA-argF</i> )U169 <i>deoR recA1 endA1 hsdR17</i> (r $\kappa^-$ , m $\kappa^+$ ) <i>phoA supE44</i> $\lambda^-$ <i>thi-1 gyrA96 relA1</i> | (57)                |
| RP437             | <i>Wild-type strain</i>                                                                                                                                                                                       | (58)                |
| RP6894            | <i>motA</i> and <i>motB</i> null strain                                                                                                                                                                       | (59)                |
| RP3098            | <i>flhD</i> and <i>flhC</i> null strain                                                                                                                                                                       | (60)                |
| DFB245            | <i>motA</i> and <i>fliG</i> null strain                                                                                                                                                                       | (34)                |
| DFB225            | <i>fliG</i> null strain                                                                                                                                                                                       | (10)                |
| Plasmids          |                                                                                                                                                                                                               |                     |
| pBAD24            | pBR322-derived vector, <i>araBAD</i> promoter, Amp <sup>r</sup>                                                                                                                                               | (61)                |
| pBAD33            | pACYC-derived vector, <i>araBAD</i> promoter, Cm <sup>r</sup>                                                                                                                                                 | (61)                |
| pYS3              | <i>Vibrio pomA</i> and chimeric <i>potB</i> in pBAD24                                                                                                                                                         | (40)                |
| pTSK170           | <i>E. coli fliG</i> , <i>Vibrio pomA</i> and chimeric <i>potB</i> in pBAD24                                                                                                                                   | This study          |

|                                                                                       |                                                                                         |            |
|---------------------------------------------------------------------------------------|-----------------------------------------------------------------------------------------|------------|
| pTY801                                                                                | <i>E. coli fliG</i> in pBAD24                                                           | This study |
| pEVOL-pBpF                                                                            | Plasmid for the incorporation of photo-reactive amino acid, pBPA, into the amber codon. | (48)       |
| Amp <sup>r</sup> , ampicillin-resistant; Cm <sup>r</sup> , chloramphenicol-resistant. |                                                                                         |            |

702
